## CORRECTION

# Correction: Validity and reliability International Classification of Diseases-10 codes for all forms of injury: A systematic review

The *PLOS One* Staff

## Notice of republication

This article was republished on January 16, 2025, to correct an error in the author list. Michael D. Cusimano was mistakenly omitted from the author byline. The publisher apologizes for this error. Please download the article again to view the corrected version. For reference, both the originally published, uncorrected article and the republished, corrected article are provided here.

## Supporting information

**S1 File. Originally published, uncorrected article.**  
(PDF)

**S2 File. Republished, corrected article.**  
(PDF)

## Reference

1. Paleczny S, Osagie N, Sethi J, Cusimano MD (2024) Validity and reliability International Classification of Diseases-10 codes for all forms of injury: A systematic review. *PLoS ONE* 19(2): e0298411. <https://doi.org/10.1371/journal.pone.0298411> PMID: 38421992

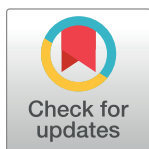

## OPEN ACCESS

**Citation:** The *PLOS One* Staff (2025) Correction: Validity and reliability International Classification of Diseases-10 codes for all forms of injury: A systematic review. *PLoS ONE* 20(1): e0318388. <https://doi.org/10.1371/journal.pone.0318388>

**Published:** January 24, 2025

**Copyright:** © 2025 The PLOS One Staff. This is an open access article distributed under the terms of the [Creative Commons Attribution License](https://creativecommons.org/licenses/by/4.0/), which permits unrestricted use, distribution, and reproduction in any medium, provided the original author and source are credited.
